# Supplementary material for: DLREFD: a database providing associations of long non-coding RNAs, environmental factors and phenotypes
Source: Database (Oxford). 2017 Oct 25;2017:bax084. doi: 10.1093/database/bax084 (PMC5737057; doi:10.1093/database/bax084)
Supplement: Supplementary File 1 [file bax084_supp_file_s1.xlsx]

## Sheet: Sheet1
alcohol
altitude
calorie
chemical
cholesterol
cigarette
corn oil
diet
dietary
drinking
drug
energy intake
environment
environmental
environmental carcinogens
exercise
fat
fish oil
infectious agents
latitude
malaria
nutrition
nutritional
oxygen tension
physical
pollution
protein intake
Radiation
radio
seasonality
sleep
smokng
stress
tobacco
wine
(Diaminomethyl-Methyl-Amino)-Acetic Acid
(Diphosphono)Aminophosphonic Acid
(E)-2-Fluoro-P-Hydroxycinnamate
(Mu-4-Sulfido)-Tetra-Nuclear Copper Ion
(P-Iodophenylacetylamino)Methylphosphinic Acid
(R)-4-Amino-Isoxazolidin-3-One
(R)-Mandelic Acid
(R)-Mesopram
(R)-N-(1-Methyl-Hexyl)-Formamide
(R)-Rolipram
(R,R)-2,3-Butanediol
(S)-4-Nitrostyrene oxide
(S)-Des-Me-Ampa
(S)-Hmg-Coa
(S)-N-(3-Indol-1-Yl-2-Methyl-Propyl)-4-Sulfamoyl-Benzamide
(S)-Rolipram
(S)-tacrine(10)-hupyridone
A Disubstituted Succinyl Caprolactam Hydroxymate Mmp3inhibitor
Abarelix
Abciximab
Abequose
Acamprosate
Acarbose
Acenocoumarol
Aceprometazine
Acetaminophen
Acetazolamide
Acetoacetic Acid
Acetoacetyl-Coenzyme A
Acetohydroxamic Acid
ACETOPHENONE
Acetylamino-Acetic Acid
Acetyldigitoxin
Aciclovir
Acitretin
Adamantanone
Adapalene
Adenosine Diphosphate 5-(Beta-Ethyl)-4-Methyl-Thiazole-2-Carboxylic Acid
Adenosine monophosphate
Adenosine-2'-5'-Diphosphate
Adenosine-5'-Diphosphate Monothiophosphate
Adenosine-5-Diphosphoribose
Adenosine-5'-Monophosphate Glucopyranosyl-Monophosphate Ester
Adenosine-5'-Phosphosulfate
Adenosyl-Ornithine
Adenylyl-3'-5'-Phospho-Uridine-3'-Monophosphate
AL5300
AL5927
AL7099A
AL7182
Alclometasone
Alemtuzumab
Aliskiren
Alitretinoin
Allopurinol
Allosamizoline
All-Trans Axerophthene
Almitrine
Almotriptan
Alpha Chlorophyll A
Alpha,Alpha,Alpha-Trifluoro-P-Cresol
Alpha,Beta-Methyleneadenosine-5'-Triphosphate
Alpha-1-proteinase inhibitor
Alpha-Aminobutyric Acid
Alpha-Benzyl-Aminobenzyl-Phosphonic Acid
Alpha-D-Galactose-1-Phosphate
Alpha-D-Glucose 1,6-Bisphosphate
Alpha-D-Glucose-1-Phosphate
Alpha-D-Glucose-6-Phosphate
Alpha-Difluoromethylornithine
Alpha-D-Mannose-6-Phosphate
Alpha-Hydroxy-Beta-Phenyl-Propionic Acid
Alpha-L-1-Methyl-Fucose
Alpha-L-Arabinofuranose
Alpha-L-Fucose
Alpha-methyl-D-galactoside
Alpha-Methyl-N-Acetyl-D-Glucosamine
Alpha-Ribazole-5'-Phosphate
Alpha-Ribazole-5'-Phosphate Derivative
Alrestatin
Alsterpaullone
Alteplase
Aluminium
Ambenonium
Amcinonide
Amido Phenyl Pyruvic Acid
Amikacin
Amineptine
Aminocaproic Acid
Aminoglutethimide
Aminolevulinic acid
Amiodarone
Amisulpride
Amlodipine
Amodiaquine
Amoxapine
Amoxicillin
AMPA
AMPCPR
Amphetamine
Amphotericin B
Ampicillin
Amprenavir
Amsacrine
Amylamine
Amylotriose
Analogue of Indinavir Drug
ANILINOMETHYL GLUCO-PHENYLIMIDAZOLE
Anisotropine Methylbromide
Anistreplase
Antihemophilic Factor
Aplyronine A
Apraclonidine
Aprepitant
Ara-Alpha(1,3)-Xyl
Arbutamine
Ardeparin
Arformoterol
Argadin
Argatroban
Argifin
Arginineamide
Aripiprazole
Asparaginase
Aspartame
Aspartate Semialdehyde
Aspartic Acid-4-Carboxymethyl Ester
Astemizole
Atazanavir
Atenolol
Atorvastatin
Atpenin A5
Azacitidine
Azatadine
Azelastine
Aztreonam
Bacteriochlorophyll A
Balsalazide
Basiliximab
Batimastat
Bb-3497
Becaplermin
Benzamidine
Benzene Hexacarboxylic Acid
Benzenesulfonyl
Benzocaine
Benzofuran
Benzoic Acid Phenylmethylester
Benzphetamine
Benzquinamide
Benzylamine
Bepotastine
Bepridil
Berberine
Bestatin
Beta-1,4-Galactobioside
Beta-1,4-Galactotrioside
Beta-3-Serine
Beta-Alanine
Beta-Amino Isobutyrate
Beta-Cyclohexyl-Alanine
Beta-Dadf, Msa, Multisubstrate Adduct Inhibitor
Beta-D-Arabinofuranose-5'-Phosphate
Beta-D-Glucopyranose Spirohydantoin
Beta-Hydroxyaspartic Acid
Beta-Hydroxytryptophane
Beta-Mercaptoethanol
Betamethasone
Beta-Methyl-D-Galactoside
Betazole
Bevacizumab
Bezafibrate
BIA
Bicalutamide
Bifonazole
Biopterin
BIOTINOL-5-AMP
Biotinyl P-Nitroaniline
Biphenyl-2,3-Diol
Biphenylalanine
Bis(5-Amidino-2-Benzimidazolyl)Methane Ketone
Bis(5-Amidino-Benzimidazolyl)Methane
Bis(5-Amidino-Benzimidazolyl)Methane Zinc
Bis(Adenosine)-5'-Pentaphosphate
BIS(HEXAMETHYLENE)TRIAMINE
bis(molybdopterin)tungsten cofactor
Bis-Napthyl Beta-Ketophosphonic Acid
Bleomycin
BMS184394
Bmsc-0013
BOC-GAMMA-D-GLU-L-LYS(CBZ)-D-BOROALA
Boldenone
Bortezomib
Bosentan
Botulinum Toxin Type B
Brequinar Analog
Bretylium
Brinzolamide
Brodimoprim-4,6-Dicarboxylate
Bromocriptine
Bromopurine
Bromo-Willardiine
Brompheniramine
Budesonide
Bupropion
Busulfan
Butan-1-Ol
Butenoic Acid
Butethal
Butoconazole
Butorphanol
Butyramide
Butyrylthiocholine
BV1
BV2
BV4
BVDU-MP
C-(1-Azido-Alpha-D-Glucopyranosyl) Formamide
C-(1-Hydrogyl-Beta-D-Glucopyranosyl) Formamide
Cabergoline
Camptothecin
Canaline
Candicidin
Capreomycin
Capric Acid
Capromab
Carbachol
Carba-Nicotinamide-Adenine-Dinucleotide
Carbaphosphonate
Carbenoxolone
Carbetocin
Carbidopa
Carbimazole
Carbobenzoxy-Pro-Lys-Phe-Y(Po2)-Ala-Pro-Ome
Carboplatin
Carboprost Tromethamine
Carboxin
Carboxyatractyloside
Carboxylic PRPP
Carboxymethylated Cysteine
Carboxymethylthio-3-(3-Chlorophenyl)-1,2,4-Oxadiazol
Carboxymycobactin T
Carfentanil
Carmustine
Carprofen
Carteolol
Carvedilol
CBZ-LEU-LEU-TYR-CH2F
CD564
Cefaclor
Cefadroxil
Cefamandole
Cefdinir
Cefditoren
Cefepime
Cefixime
Cefmetazole
Cefonicid
Cefotaxime
Cefotaxime Group
Cefprozil
Ceftibuten
Ceftizoxime
Ceftriaxone
Cefuroxime
Cellobiose
Cellotetraose
Cellotriose
Cephalexin
Cephaloglycin
Cephalothin Group
Cerivastatin
Ceruletide
Cetirizine
Cetrorelix
Chitotriose
Chlordiazepoxide
Chlormezanone
Chloroacetone
Chlorophyll A
Chlorophyll B
Chlorpheniramine
Chlorpromazine
Chlorthalidone
Cholesterol
Cholesteryl Linoleate
Choline
Choriogonadotropin alfa
Chymostatin
Ciclopirox
Cidofovir
Cilastatin
Cilostazol
Cimetidine
Cinacalcet
Cinalukast
Cinolazepam
Cinoxacin
Ciprofloxacin
Cisatracurium Besylate
Cisplatin
Cis-tetracosenoyl sulfatide
Citraconic acid
Citric Acid
Cladribine
Clenbuterol
Clidinium
Clindamycin
Clobazam
Clofarabine
Clofazimine
Clomipramine
Clomocycline
Clonazepam
Clonidine
Clorobiocin
Clotiazepam
Clozapine
Cmp-2-Keto-3-Deoxy-Octulosonic Acid
Coa-S-Acetyl Tryptamine
Codeine
Coelenteramide
Collagenase
Co-Methylcobalamin
Compound 15
Compound 16
Compound 18
Compound 4-D
Compound 5, 2-(Naphthalen-1-Yl-Oxalyl-Amino)-Benzoicacid
Compound 9
Conjugated Estrogens
Coprogen
Cosyntropin
Cp-166572, 2-Hydroxymethyl-4-(4-N,N-Dimethylaminosulfonyl-1-Piperazino)-Pyrimidine
Cpad
Cp-Coeleneterazine
CRA_10433
CRA_10655
CRA_10762
CRA_10950
CRA_10972
CRA_11092
CRA_16847
CRA_17312
CRA_17693
CRA_1801
CRA_23653
CRA_7806
CRA_8696
CRA_9334
Crc200 (Chiron-Behring)
Cryptenamine
Cu-Bicyclam
Cu-Cyclam
Cyanocinnoline
Cyclacillin
cyclic 3',5'-thymidine monophosphate
Cyclic Guanosine Monophosphate
Cyclizine
Cyclobenzaprine
Cyclohexane
Cyclohexane Propionic Acid
Cyclohexylammonium Ion
Cyclohexylformamide
Cyclohexyl-Hexyl-Beta-D-Maltoside
Cyclophosphamide
Cycloserine
Cyclosporine
Cyclo-Tetrametavanadate
Cyclouridine
Cycrimine
Cysteamine
Cysteine Sulfenic Acid
Cysteine-S-Acetamide
Cystein-S-Yl Cacodylate
Cytidine 5'-Diphosphoglycerol
Cytidine-3'-Monophosphate
Cytidine-5'-Diphospho-Beta-D-Xylose
Cytidyl-2'-5'-Phospho-Guanosine
Cytosine Arabinose-5'-Phosphate
D-(L-a-Aminoadipoyl)-L-Cysteinyl-D-Isodehydrovaline
D-2-Amino-3-Phosphono-Propionic Acid
D-2-Keto-3-Deoxygalactonate
Dacarbazine
Dactinomycin
Dalfopristin
Dansyllysine
Dapiprazole
Dapsone
Daptomycin
D-Arginine
Darunavir
Dasatinib
Dcka, 5,7-Dichlorokynurenic Acid
D-Cysteine
Deacetoxycephalosporin-C
Deamido-Nad+
Debrisoquin
Decanoic Acid
Decitabine
Defibrotide
Degraded Cephaloridine
DEHYDRO-2(S)-AMINO-6-BORONOHEXANOIC ACID
Delavirdine
Delta-Amino Valeric Acid
Delta-Bis(2,2'-Bipyridine)Imidazole Osmium (Ii)
Delta-Bis(2,2'-Bipyridine)Imidazole Ruthenium (Ii)
Demecarium bromide
Deoxy-2-Fluoro-B-D-Cellotrioside
Deoxy-Bigchap
deoxycytidylyl-3',5'-guanosine
Deoxyuridine-5'-Triphosphate
DERIVATIVE OF AKLANONIC ACID METHYL ESTER (AAME)
Deslanoside
Desmopressin
Desogestrel
Desonide
Desoximetasone
Desoxycorticosterone Pivalate
Desulfo-Coenzyme A
Dexamethasone
Dexbrompheniramine
Dexmedetomidine
Dextrofloxacine
D-Galctopyranosyl-1-On
D-Gluconhydroximo-1,5-Lactam
D-Glucose in Linear Form
D-Glutamine
D-Glycero-D-Mannopyranose-7-Phosphate
Diacetyldeuteroheme
Diazepam
Dibenzofuran-4,6-Dicarboxylic Acid
Dibucaine
Dica
Dichlorphenamide
Dicloxacillin
Dicumarol
Didanosine
Dienestrol
Diethylcarbamazine
Diethylcarbamodithioic Acid
Diethylphosphono Group
Diflunisal
Difluoromethionine
Digalactosyl Diacyl Glycerol (Dgdg)
Digoxin Immune Fab
Dihydro-Acarbose
Dihydroergotamine
Dihydrogenphosphate Ion
Dihydrolipoic Acid
Dihydromorphine
Dihydroorotic Acid
Dihydrotachysterol
Dihydroxyaluminium
Di-Linoleoyl-3-Sn-Phosphatidylcholine
Diltiazem
Dimethylallyl Diphosphate
Dimethylallyl S-Thiolodiphosphate
Dimethylthiambutene
Dimethyltryptamine
Diminazene
Dinitrophenylene
Dinoprost Tromethamine
dioxothiomolybdenum(VI) ion
Dioxyselenocysteine
Diphemanil Methylsulfate
Diphenylacetic Acid
Diphenylpyraline
Diphthamide
Dipivefrin
Dirithromycin
Disopyramide
Diundecyl Phosphatidyl Choline
Diureido-Acetate
D-Mannose 1-Phosphate
DMP450
Dmp450(Inhibitor of Dupont Merck)
D-Myo-Inositol-2,4,5-Trisphosphate
D-Myo-Inositol-Hexasulphate
Dobutamine
Docetaxel
Docosa-4,7,10,13,16,19-Hexaenoic Acid
Dodecane
Dodecane-Trimethylamine
Dodecyl-Alpha-D-Maltoside
Dofetilide
Dolasetron
Domperidone
Donepezil
Dopamine
Dornase Alfa
Dorzolamide
Doxacurium
Doxepin
Doxycycline
D-Para-Chlorophenyl-1-Acteamidoboronic Acid Alanine
Dpb-T
D-Phenylalanine
DPI59
D-Pyridoxyl-N,O-Cycloserylamide-5-Monophosphate
Drospirenone
Droxidopa
D-Threonine
D-Tryptophan
Dump
Duroquinone
Dutasteride
D-Xylitol
Dyclonine
Dyphylline
ECGONINE METHYL ESTER
Edrophonium
Efalizumab
Efavirenz
Elaidoylamide
Eletriptan
EM-1745
Emedastine
Emtricitabine
Encainide
Enflurane
Enoxacin
Epinastine
Epirubicin
Epoprostenol
Epothilone B
Epothilone D
Ergocalciferol
Ergoloid mesylate
Erythrityl Tetranitrate
Ester
Estradiol
Estramustine
Estrone
Etanercept
Ethanol
Ethanolamine
Etheno-Nadp
Ethinamate
Ethionamide
Ethosuximide
Ethyl Dihydrogen Diphosphate
Ethyl Dihydrogen Phosphate
Ethyl Dimethyl Ammonio Propane Sulfonate
Ethylene Glycol
Ethylisothiourea
Ethylmorphine
Ethynodiol Diacetate
Etodolac
Etomidate
Etonogestrel
Etoposide
Etorphine
Etretinate
Everolimus
Exemestane
Exenatide
Felypressin
Fe-Mesopone
Fenofibrate
Fenoprofen
Fentanyl
Fexofenadine
Fica
Filaminast
Filgrastim
Finasteride
FKB-001
Flavin-Adenine Dinucleotide
Flavin-Adenine Dinucleotide-N5-Isobutyl Ketone
Flavopiridol
Flavoxate
F-Loop of Vitamin B12
Floxuridine
Fluconazole
Fludiazepam
Fludrocortisone
Flufenamic Acid
Flumethasone Pivalate
Flunisolide
Fluocinolone Acetonide
Fluocinonide
Fluorescein
Fluorometholone
Fluoro-Phosphite Ion
Fluorotryptophane
Flupenthixol
Fluphenazine
Fluspirilene
Flutamide
Fluvoxamine
Follitropin beta
Fondaparinux sodium
Formycin B
Formycin-5'-Monophosphate
Foscarnet
Fosphenytoin
FR117016
FR221647
FR239087
Frovatriptan
Fructose
Fumagillin
Furosemide
Fusicoccin
Gabapentin
Gadobenate Dimeglumine
GALACTOSE GREASE
Gallamine Triethiodide
Gallichrome
Gamma(Amino)-Butyric Acid
Gamma-Arsono-Beta, Gamma-Methyleneadenosine-5'-Diphosphate
Gamma-Glutamylcysteine
Ganciclovir
GC-24
Ge2270a
Geldanamycin
Gemcitabine
Gemtuzumab ozogamicin
Genistein
Geranyl Diphosphate
Ghavamiol
Ginkgo biloba
Glibenclamide
Gliclazide
Glimepiride
Glucagon recombinant
Gluconic Acid
Gluconolactone
Glucosamine
Glucosamine 1-Phosphate
Glucosamine 4-Phosphate
Glucose-Uridine-C1,5'-Diphosphate
Glutamine Hydroxamate
Glutaric Acid
Glutathione
Glutathione S-(2,4 Dinitrobenzene)
GLUTATHIONE SULFINATE
Glycerol
Glycinamid
Glycinamide Ribonucleotide
Glycine
Glycochenodeoxycholic Acid
Glycoluril
Glycopyrrolate
Glycyl-L-Alpha-Amino-Epsilon-Pimelyl-D-Alanyl-D-Alanine
Gpi-1046
Grepafloxacin
Guanabenz
Guanadrel Sulfate
Guanethidine
Guanfacine
Guanosine
Guanosine 5'-(Trihydrogen Diphosphate), P'-D-Mannopyranosyl Ester
GUANOSINE-2',3'-O-ETHYLIDENEPHOSPHONATE
Guanosine-2'-Monophosphate
Guanosine-3',5'-Monophosphate
Guanosine-3'-Monophosphate-5'-Diphosphate
Guanosine-5'-Diphosphate
Guanosine-5'-Triphosphate
H TYPE II TRISACCHARIDE
Halazepam
Halofantrine
Heme
Heptaethylene Glycol, Peg330
Heptane-1,2,3-Triol
Heptyl 1-Thiohexopyranoside
Heptyl-Beta-D-Glucopyranoside
Hesperetin
Hetacillin
Hexatantalum Dodecabromide
Hexobarbital
Hexylcaine
Histamine Phosphate
Homatropine Methylbromide
Homoserine Lactone
Human Serum Albumin
Hyaluronidase
Hybrid Between B and C Type Hemes (Protoporphyrin Ixcontaining Fe)
Hydantocidin-5'-Monophosphate
Hydrocodone
Hydrocortamate
Hydrocortisone
Hydrogenobyrinic Acid
Hydroxocobalamin
Hydroxyacetic Acid
Hydroxychloroquine
Hydroxyzine
Hyperforin
Hypophosphite
Ibutilide
IC261
Icosapent
Icrf-187
Iloprost
Imatinib
Imidazole
Indecainide
Indene
Indinavir
Indole
Indole Naphthyridinone
Indole-3-Glycerol Phosphate
Indole-3-Propanol Phosphate
Indomethacin
Inhibitor Bea322
Inhibitor Idd 384
Inhibitor of P38 Kinase
Inosinic Acid
Inositol 1,3,4,5-Tetrakisphosphate
Inositol-(1,3,4,5)-Tetrakisphosphate
Inositol-(1,3,4,5,6)-Pentakisphosphate
Insulin Lyspro recombinant
Insulin-glargine
Interferon alfa-n1
Interferon beta-1b
Interferon gamma-1b
Iodophenyl
Iodo-Phenylalanine
Irbesartan
ISO24
Isochorismic Acid
Isocitric Acid
Isoflurane
Isoflurophate
Isoformononetin
ISOPENTENYL PYROPHOSPHATE
Isopentyl Pyrophosphate
Isopropyl Alcohol
Isoproterenol
Isoquinoline
Isosorbide Dinitrate
Isosorbide Mononitrate
Isotretinoin
Isovaleric Acid
Isradipine
Jaspisamide A
Je-2147, Ag1776, Kni-764
K201
K-252a
Kabiramide C
Kanamycin
Ketoconazole
Ketorolac
Ketotifen
L-2-Amino-4-(Guanidinooxy)Butyric Acid
L-2-Amino-6-Methylene-Pimelic Acid
L-756,423
Lactaldehyde
Lactic Acid
Lactose Sialic Acid
Lactulose
L-Alfa-Lysophosphatidylcholine, Lauroyl
L-Alpha-Glycerophospho-D-Myo-Inositol-4,5-Bis-Phosphate
L-Alpha-Glycerophosphorylethanolamine
Lambda-Bis(2,2'-Bipyridine)Imidazole Osmium (Ii)
Lamivudine
Lamotrigine
Lanosterol
L-Arginine
L-Asparagine
Lauryl Dimethylamine-N-Oxide
L-Carnitine
L-Citrulline
L-Cysteine
Lepirudin
Letrozole
Leucine Phosphonic Acid
Leuprolide
Levetiracetam
Levobunolol
Levobupivacaine
Levocabastine
Levonorgestrel
Levosimendan
Levothyroxine
Levulinic Acid
LFA703
L-Glucuronic Acid
L-Glycero-D-Manno-Heptopyranose
L-Guluronic Acid 6-Phosphate
L-Homoarginine
L-Iduronic Acid
Lincomycin
Lindane
Linezolid
Lipoic Acid
L-Iso-Aspartate
Lisuride
L-Leucine
L-Leucyl-Hydroxylamine
L-N(Omega)-Nitroarginine-2,4-L-Diaminobutyric Amide
L-Naphthyl-1-Acetamido Boronic Acid Alanine
Lofexidine
Lomefloxacin
Lomustine
Lopinavir
Loracarbef
Loratadine
Lorazepam
L-Ornithine
Loteprednol Etabonate
L-Phenylalanine
L-Phospholactate
L-Proline
L-Rhamnose
L-Serine
L-Tyrosinamide
L-Tyrosine
Lutropin alfa
L-Valine
L-Xylitol 5-Phosphate
L-Xylulose 5-Phosphate
Ly231514 Tetra Glu
LY374571
Lymecycline
Lysophosphatidylglycerol
Magnesium
Magnesium Sulfate
Malonaldehyde
Malonyl-Coenzyme A
M-Aminophenylboronic Acid
Mannobiose
Maprotiline
Matairesinol
Mazindol
M-Cresol
Mdl 101,146
Mdl-29951
Mebendazole
Mecamylamine
Mechlorethamine
Meclizine
Medroxyprogesterone
Megestrol
Memantine
Menadione
Menthol
Mephentermine
Meprobamate
Mercaptocarboxylate Inhibitor
Mercaptomethyl Phosphonate
Mercaptopurine
Mercury Acetate Ion
Mesalazine
Mestranol
Metanitrophenyl-Alpha-D-Galactoside
Metformin
Methadone
Methamphetamine
Methantheline
Metharbital
Methazolamide
Methdilazine
Methimazole
Methotrexate
Methotrimeprazine
Methoxamine
Methoxsalen
Methyclothiazide
Methyl aminolevulinate
Methyl Mercury Ion
Methyl Methylsulfinylmethyl Sulfide
Methyl Nonanoate (Ester)
Methyl Phosphinic Acid
Methyl(6s)-1-Thio-L-Manno-Hexodialdo-6,2-Pyranoside
Methyl-2-S-(Alpha-D-Mannopyranosyl)-2-Thio-Alpha-D-Mannopyranoside
Methyldopa
Methylergonovine
Methylethylamine
Methylmalonic Acid
Methylmalonyl-Coenzyme A
Methylphenobarbital
Methylphenyl carbinol
Methylphosphinic Acid
Methylphosphonic Acid Diisopropyl Ester
Methylphosphonic Acid Ester Group
Methylthioinosine
Methyltrienolone
Methylumbelliferyl Chitotriose
Methylumbelliferyl Sialic Acid
Meticillin
Metipranolol
METOPRINE, METHODICHLOROPHEN
Metoprolol
Metronidazole
Metyrosine
Mexiletine
Mezlocillin
MF268
Miconazole
Midazolam
Miglitol
Miglustat
Minaprine
Mitiglinide
Mitoxantrone
Mivacurium
Mixed Carbamic Phosphoric Acid Anhydride of 7,8-Diaminononanic Acid
MMDA
MMI-175
Mo(Vi)(=O)(Oh)2 Cluster
Modafinil
Moexipril
Molybdenum Cofactor
Monastrol
Monoisopropylphosphorylserine
Monothioglycerol
Montelukast
Motuporin
MOXALACTAM (HYDROLYZED)
Moxalactam Derivative
Moxifloxacin
Mrna Cap Analog N7-Methyl Gpppg
Mycophenolic acid
Myristoyl-Coa
N-(1,4-DIHYDRO-5H-TETRAZOL-5-YLIDENE)-9-OXO-9H-XANTHENE-2-SULFONAMIDE
N-(1-Adamantyl)-N'-(4-Guanidinobenzyl)Urea
N-(1-Carboxy-3-Phenylpropyl)Phenylalanyl-Alpha-Asparagine
N-(2,3,4,5,6-Pentaflouro-Benzyl)-4-Sulfamoyl-Benzamide
N-(2,6-Diflouro-Benzyl)-4-Sulfamoyl-Benzamide
N-(2-Ferrocenylethyl)Maleimide
N-(3-Phenyl-2-Sulfanylpropanoyl)Phenylalanylalanine
N-(3-Propylcarbamoyloxirane-2-Carbonyl)-Isoleucyl-Proline
N(4)-adenosyl-N(4)-methyl-2,4-diaminobutanoic acid
N-(4-Aminobutanoyl)-S-(4-Methoxybenzyl)-L-Cysteinylglycine
N-(4-Hydroxyphenyl)All-Trans Retinamide
N-(4-MORPHOLINE)CARBONYL-B-(1-NAPHTHYL)-L-ALANINE-L-LEUCINE BORONIC ACID
N-(5'-Phosphopyridoxyl)-D-Alanine
N-(M-Trifluoromethylphenyl) Phenoxazine-4,6-Dicarboxylic Acid
N-(Phosphonoacetyl)-L-Ornithine
N-(R-Carboxy-Ethyl)-Alpha-(S)-(2-Phenylethyl)Glycyl-L-Arginine-N-Phenylamide
N-(Sulfanylacetyl)Tyrosylprolylmethioninamide
N,4-Dihydroxy-N-Oxo-3-(Sulfooxy)Benzenaminium
N,N'-Bis(4-Amino-2-Methylquinolin-6-Yl)Urea
N,N-Bis(4-Chlorobenzyl)-1h-1,2,3,4-Tetraazol-5-Amine
N,O-Didansyl-L-Tyrosine
N~2~-Succinylornithine
N1,N14-Bis((S-Methyl)Isothioureido)Tetradecane
N-1-Methylheptylformamide
N2-(Carboxyethyl)-L-Arginine
N-2-Thiophen-2-Yl-Acetamide Boronic Acid
N5-(1-Imino-3-Butenyl)-L-Ornithine
N7-Methyl-Formycin A
Nabumetone
N-Acetylalanine
N-Acetyl-D-Allosamine
N-Acetyl-D-Galactosamine 6-Sulfate
N-Acetyl-D-glucosamine
N-ACETYLHISTAMINE
N-Acetyl-L-Citrulline
N-Acetyl-L-Glutamate
N-Acetyl-L-Glutamine
N-Acetylmannosaminitol
N-Acetyl-P-Nitrophenylserinol
N-Acetylproline
NADH
Nafcillin
Naftifine
Nalidixic Acid
N-Alpha-(2-Naphthylsulfonyl)-N(3-Amidino-L-Phenylalaninyl)-4-Acetyl-Piperazine
N-Alpha-(2-Naphthylsulfonyl)-N-(3-Amidino-L-Phenylalaninyl)-D-Pipecolinic Acid
N-Alpha-(2-Naphthylsulfonyl)-N(3-Amidino-L-Phenylalaninyl)Isopipecolinic Acid Methyl Ester
Nalpha-(2-Naphthylsulfonylglycyl)-3-Amidino-D,L-Phenylalanine-Isopropylester
N-Alpha-Acetyl-3,5-Diiodotyrosylglycine
N-Alpha-L-Acetyl-Arginine
Namn
Nanaomycin D
Nandrolone
Naphthyridine Inhibitor
Naratriptan
Natalizumab
Nateglinide
N-Butylbenzene
N-Butyl-Benzenesulfonamide
N-Butyl-N'-Hydroxyguanidine
N-Carbamoyl-L-Aspartate
N-Carbamyl-D-Methionine
N-Carbamyl-D-Valine
Ncs-Chromophore
N-Cyclopentyl-N-Cyclobutylformamide
Ndelta-(N'-Sulphodiaminophosphinyl)-L-Ornithine
N-Dimethyl-Lysine
Nelarabine
Nelfinavir
Neomycin
N-Ethylmaleimide
Nevirapine
N-Formylmethionine
N-Formylpiperidine
N-Heptylformamide
N-Hexadecanoylglycine
N-Hexylphosphonate Ethyl Ester
N-Hydroxy 1n(4-Methoxyphenyl)Sulfonyl-4-(Z,E-N-Methoxyimino)Pyrrolidine-2r-Carboxamide
N-Hydroxy-1-(4-Methoxyphenyl)Sulfonyl-4-Benzyloxycarbonyl-Piperazine-2-Carboxamide
N-Hydroxy-4-Phosphono-Butanamide
N-Hydroxyguanidine
Niacin
Nicergoline
Nicotinamide 8-Bromo-Adenine Dinucleotide Phosphate
Nicotinamide Mononucleotide
Nicotine
Niflumic Acid
Nilutamide
Nimodipine
Nisoldipine
N-Isopropyl-N'-Hydroxyguanidine
Nitazoxanide
Nitrendipine
Nitric Oxide
NITROCEFIN
Nitrocefin Acyl-Serine
Nitroglycerin
Nitromethyldethia Coenzyme A
Nitrosoethane
Nizatidine
N-Methylmesoporphyrin Containing Copper
N-Methyl-N-Propargyl-1(R)-Aminoindan
N-Methyl-Pyridoxal-5'-Phosphate
N-Octane
N-Omega-Propyl-L-Arginine
Nonan-1-Ol
Norethindrone
Norleucine
Norleucine Phosphonate
Norvaline
Novo Nordisk aS Compound
Novobiocin
N-Phenylthiourea
N-Propargyl-1(S)-Aminoindan
N-Propyl-Tartramic Acid
N-Pyridoxyl-1-Amino-Cyclopropanecarboxylic Acid-5-Monophosphate
N-PYRIDOXYL-D-GLUTAMIC ACID-5'-MONOPHOSPHATE
N'-Pyridoxyl-Lysine-5'-Monophosphate
N-Sulfo-Flavin Mononucleotide
N-Tridecanoic Acid
NU1025
N-Valeric Acid
Nz-(1-Carboxyethyl)-Lysine
Nz-(Dicarboxymethyl)Lysine
Nz2-Tryptophan
O1-Methyl-4-Deoxy-4-Thio-Alpha-D-Glucose
O1-Methyl-Mannose
O2-Sulfo-Glucuronic Acid
O4-Sulfonylgalactose
O6-(R)-ROSCOVITINE, R-2-(6-BENZYLOXY-9-ISOPROPYL-9H-PURIN-2-YLAMINO)-BUTAN-1-OL
O-Acetylserine
O-Benzylsulfonyl-Serine
Octamethylenediamine
Octanoyl-Coenzyme A
Octreotide
Octylphenoxy polyethoxyethanol
Oleic Acid
Olomoucine
Ondansetron
Open Form of 2'-Deoxy-Ribofuranose-5'-Phosphate
O-Phosphoglycolohydroxamate
Oprelvekin
Orotic Acid
Orotidine-5'-Monophosphate
Oseltamivir
O-Sialic Acid (Chair Conformation)
Ouabain
Oxacillin
Oxalate Ion
Oxalic Acid
Oxamic Acid
Oxamniquine
Oxandrolone
Oxidized Acetyl Dithranol
Oxidized Glutathione Disulfide
Oxiranpseudoglucose
Oxonic Acid
Oxybuprocaine
Oxybutynin
Oxycodone
Oxymorphone
Oxyphencyclimine
Oxytetracycline
P-(2'-Iodo-5'-Thenoyl)Hydrotropic Acid
Palivizumab
Palmitic Acid
Palonosetron
Pamidronate
Pancuronium
P-Anisic Acid
Pantothenoylaminoethenethiol
Pantothenyl-Aminoethanol-Acetate Pivalic Acid
Pantoyl Adenylate
Para-Isopropylaniline
Para-Mercury-Benzenesulfonic Acid
Paramethadione
Paramethasone
Paricalcitol
Paroxetine
PD150606
Pefloxacin
Pegaptanib
Pegfilgrastim
Pegvisomant
Peldesine
Pemirolast
Penicillamine
Penicillin V
Pentabromophenol
Pentanal
Pentane-1,5-Diamine
Pentobarbital
Pentolinium
Pergolide
Perhexiline
Phencyclidine
Phendimetrazine
Phenformin
Phenindamine
Phenobarbital
Phenol
Phenprocoumon
Phenylacetaldehyde
Phenylalanine Amide
Phenylalanine-N-Sulfonamide
Phenylalanylmethane
Phenylethane Boronic Acid
Phenylferricrocin-Iron
Phenylmercury
Phenylphosphate
Phenylpropanolamine
Phenytoin
Phosphatidyl ethanol
Phosphatidylethanolamine
Phosphoaminophosphonic Acid Guanylate Ester
Phosphoaspartate
Phosphoenolpyruvate
Phosphoglycolohydroxamic Acid
Phosphomethylphosphonic Acid Guanosyl Ester
Phosphonoacetic Acid
Phosphonopyruvate
Phosphonoserine
Phosphonothreonine
Phosphorylated Dihydropteroate
Phosphorylisopropane
P-Hydroxybenzoic Acid
Phytonadione
Pimecrolimus
Pimozide
Pindolol
Pioglitazone
Pipobroman
Piretanide
Pivmecillinam
Pmp-Hydroxyisoxazole, Pyridoxamine-5-Phosphate-Hydroxyisoxazole
P-Nitrophenol
PNU177836
POLYPROPYLENE GLYCOL, HEPTAPROPYLENE GLYCOL
Polythiazide
Porfimer
Porphobilinogen
Potassium Chloride
Pramipexole
Pramlintide
Pranlukast
Prazepam
Praziquantel
Prazosin
Prednicarbate
Prednisone
Pregabalin
Pregnenolone
Procainamide
Procaine
Procarbazine
Prochlorperazine
Procyclidine
Progabide
Proline Betaine
Propafenone
Propanoic Acid
Proparacaine
Propidium
Propiomazine
Propionamide
Propionyl Coenzyme A
Propoxyphene
Propranolol
Propyl Acetate
Prostaglandin G2
Protoporphyrin Ix Containing Co
Protoporphyrin Ix Containing Zn
Pteric Acid
Pterin Cytosine Dinucleotide
Pterin-6-Yl-Methyl-Monophosphate
Pteroic Acid
Purine Riboside
Purine Riboside-5'-Monophosphate
PUROMYCIN AMINONUCLEOSIDE-5'-MONOPHOSPHATE
Purvalanol
Putrescine
Pyoverdine-Chromophore
Pyrazinamide
Pyrazole
Pyridin-3-Ylmethanol
Pyridostigmine
Pyridoxal
Pyridoxal Phosphate
Pyridoxine-5'-Phosphate
Pyridoxyl-Glutamic Acid-5'-Monophosphate
Pyridoxyl-N,O-Cycloserylamide-5-Monophosphate
PYRIMIDINE-4,6-DICARBOXYLIC ACID BIS-(4-FLUORO-3-METHYL-BENZYLAMIDE)
Pyrithiamine Pyrophosphate
Pyromellitic Acid
Pyrroloquinoline Quinone
Quercetin
Quetiapine
Quinaldic Acid
Quinapril
Quinestrol
Quinidine
Quinolinic Acid
Quinonoid 7,8-Tetrahydrobiopterin
R,3-Hydroxybutan-2-One
R048-8071
Radicicol
Raloxifene
Ramelteon
Ramipril
Ranibizumab
Ranitidine
Rasagiline
Reboxetine
Reidispongiolide A
Remikiren
Remoxipride
Repaglinide
Rescinnamine
Reserpine
Resveratrol
Retapamulin
Reteplase
Rhamnose
Ribavirin
Ribavirin Monophosphate
Riboflavin Monophosphate
Ribose(Pyranose Form)
Ribose-1-Phosphate
Ribose-5-Phosphate
Ricinoleic Acid
Rifabutin
Rifampin
Rifamycin Cgp 4832
Rifaximin
Rimexolone
Rimonabant
Ritodrine
Ritonavir
Rofecoxib
Rolicyclidine
Ropinirole
Ropivacaine
Rosoxacin
Rosuvastatin
RPR128515
RU78262
RU78299
RU78300
RU78783
RU84687
RU85053
RU85493
RU90395
RWJ-51084
S-(D-Carboxybutyl)-L-Homocysteine
S-(N-Hydroxy-N-Iodophenylcarbamoyl)Glutathione
S-(P-Nitrobenzyl)Glutathione
S,S'-(1,3-Phenylene-Bis(1,2-Ethanediyl))Bis-Isothiourea
S,S'-(1,4-Phenylene-Bis(1,2-Ethanediyl))Bis-Isothiourea
S,S-(2-Hydroxyethyl)Thiocysteine
S,S-Propylthiocysteine
S-4-Nitrobutyryl-Coa
S-Acetonylcysteine
S-Adenosylmethionine
Salicyclic acid
Salmeterol
Salmon Calcitonin
Salophen-10-carboxylate iron chelate
Salsalate
Saquinavir
SB220025
S-Benzyl-Glutathione
S-Butyryl-Cystein
Scopolamine
SD146
S-Dioxymethionine
Secretin
Selegiline
Selenoinosine
Seocalcitol
Serine Vanadate
Sertindole
Sertraline
Serum albumin iodonated
Sevoflurane
S-Hydroxymethyl Glutathione
Simvastatin
Sinapoyl Coenzyme A
Sirolimus
S-Isopropyl-Isothiourea
Skf 107457
S-Mercaptocysteine
S-METHYL-4,5,6,7-TETRABROMO-BENZIMIDAZOLE
S-Octylglutathione
Sodium lauryl sulfate
Somatropin recombinant
Soraphen A
Sorbitol 6-phosphate
Sotalol
S-Oxy Cysteine
Sp7343-Sp7964
Sp-Adenosine-3',5'-Cyclic-Monophosphorothioate
Sparfloxacin
Spermine
Spermine (Fully Protonated Form)
Sphingosine
Spirapril
Spironolactone
SR11254
SR12813
Sri-9439
S-Selanyl Cysteine
S-sulphocysteine
Stavudine
Stearic acid
Sti-571
Streptomycin
SU9516
Succinic acid
Succinylcholine
Sulfacytine
Sulfadiazine
Sulfamic Acid 2,3-O-(1-Methylethylidene)-4,5-O-Sulfonyl-Beta-Fructopyranose Ester
Sulfasalazine
Sulfatide
Sulfinpyrazone
Sulfopyruvate
Sulfoquinovose-Uridine-C1,5'-Diphosphate
Sulindac
Sulodexide
Sulpiride
Sumatriptan
Sunitinib
Suramin
Swainsonine
Tagetitoxin
Talbutal
Tamoxifen
Tartronate
Taurocholic Acid
Tazarotene
Tazobactam Intermediate
Telithromycin
Telmisartan
Temafloxacin
Temozolomide
Tenecteplase
Tenofovir
Tenoxicam
Terazosin
Terbinafine
Terbutaline
Teriparatide
Terlipressin
Testolactone
Tetra(Imidazole)Diaquacopper (Ii)
Tetrabenazine
Tetrabromo-2-Benzotriazole
Tetrabutylammonium Ion
Tetracycline
Tetradecane
Tetrafluoroaluminate Ion
TETRAHEDRAL INTERMEDIATE OF BLASTICIDIN S
Tetrahydrofolic acid
Tetrahydrofuran-2-Carboxylic Acid
Tetrahydrooxazine
Tetrahydropyran
Tetramethylammonium Ion
Tetraphenylphosphonium
Tetrazolyl Histidine
Thalidomide
Thiamin Diphosphate
Thiamin Phosphate
Thiamylal
Thimerosal
THIO-ATPA
Thiocamphor
Thiocellobiose
Thiocoumarin
Thiodigalactoside
Thio-Maltopentaose
Thiopental
Thioridazine
Threonine-Aspartic Ester
Thymidine-5'- Diphosphate
Thymidine-5'-Diphospho-Beta-D-Xylose
Thymidine-5'-Phosphate
Thymidine-5'-Triphosphate
Thymine
Tiagabine
Ticlopidine
Timolol
Tiotropium
Tipranavir
Tirofiban
Tizanidine
Tocainide
Tolazamide
Tolazoline
Tolbutamide
Torasemide
Toremifene
Trandolapril
Tranexamic Acid
Trans-6-(2-Phenylcyclopropyl)-Naphthalene-2-Carboxamidine
Trans-O-Hydroxy-Alpha-Methyl Cinnamate
Trastuzumab
Trehalose-6-Phosphate
Trencam-3,2-Hopo
Tretinoin
TRIAZOLOPYRIMIDINE
Tribenuron Methyl
Tricarballylic Acid
Tri-Chloro-Acetaldehyde
Tricosanoic Acid
Tridihexethyl
Trifluoperazine
Trifluoroacetonyl Coenzyme A
Trifluoroalanine
Trifluoro-thiamin phosphate
Trihydroxyarsenite(Iii)
Trilostane
Trimeprazine
Trimethadione
Trimethaphan
Trinitrotoluene
Triphospate
Triprolidine
Tris(Hydroxymethyl)Aminomethane
Troleandomycin
Tropicamide
Trovafloxacin
Trypanothione
Tryptophanyl-5'amp
Tu-514
Tungstopterin Cofactor
Tyrosinal
Udp-Alpha-D-Xylopyranose
Udp-Glucuronic Acid
Undecanal
Undecyl-Beta-D-Maltopyranoside
Uracil mustard
Urea
Uridine
Uridine-2',3'-Vanadate
Uridine-5'-Diphosphate-2-Deoxy-2-Fluoro-Alpha-D-Galactose
Uridine-5'-Diphosphate-4-Deoxy-4-Fluoro-Alpha-D-Galactose
Uridine-5'-Monophosphate Glucopyranosyl-Monophosphateester
Uridine-Diphosphate-N-Acetylgalactosamine
Urokinase
Ursodeoxycholic acid
Valaciclovir
Valpromide
Valrubicin
Verapamil
Vidarabine
Vigabatrin
Vincristine
Vinorelbine
Violaxanthin
Vitamin B6 Complexed with 2-Amino-Hexanoic Acid
Vitamin B6 Complexed with 2-Amino-Pentanoic Acid
Vitamin E
Voglibose
Vorinostat
Willardiine
WRR-204
WRR-99
Xanthophyll
Ximelagatran
XV638
Xylarohydroxamate
Xylose-Derived Imidazole
Xylose-Derived Lactam Oxime
Zafirlukast
Z-Ala Prolinal
Zaleplon
Zidovudine
Zimelidine
Ziprasidone
ZK-805623
Zk-806450
Zoledronate
Zolpidem
Zopiclone
Z-Pro-Prolinal
CdTe QD
Cadmium
chromium
lead
dioxin
arsenic
nickel
manganese
methylmercury
trichloroethylene
dichloroacetic acid
trichloroacetic acid
particulate matter
black carbon
benzene
diethylstilbestrol
bisphenol A
folate
Hexahydro-1,3,5-trinitro-1,3,5-triazine (RDX)
Doxifluridine
Oxaliplatin
Ephrin
Curcumin
3,3'-Diindolylmethane
dexamethasone (Dex)
doxorubicin (Dox)
bortezomib
palmitate
cytarabine
17beta-estradiol (E(2))
20-hydroxyecdysone (20E)
25-Hydroxyvitamin D(3) (25(OH)D(3))
4-(methylnitrosamino)-1-(3-pyridyl)-1-butanone (NNK)
4-(methylnitrosamino)-1-(3-pyridyl)-1-butanone (NNK)- and 2-amino-3
5-aza-2-deoxycytidine (5-Aza-CdR)
5-aza-2-deoxycytidine (5-Aza-CdR) andor phenylbutyric acid (PBA)
5-aza-2'-deoxycytidine (5-Aza-dC) and trichostatin A (TSA)
5-aza-2'-deoxycytidinetrichostatin A
5-Aza-CdR andor PBA
5-Aza-dC
5-fluorouracil (5-FU)
oxaliplatin (L-OHP)
irinotecan (CPT-11)
abdominal aorta
acetaminophen (APAP)
carbon tetrachloride(CCL4)
Actinomycin-D (Act-D)
acute bout of endurance exercise
adjuvant therapy
ADR
adriamycin
air pollution in steel factory
all-trans-retinoic acid (ATRA)
aluminum-sulfate- and reactive oxygen species (ROS)
aminoglycoside
anabolic stimulus
anti-benzo(a) pyrene-7
anti-benzo[a]pyrene-trans-7
APAP
APAP and CCl4
arabinosylcytosine (Ara-C)
aromatic amine 2-acetylaminofluore (2-AAF)
Arsenic trioxide
Arsenic trioxide (As(2)O(3)
Arsenic trioxide (ATO)
As2O3
azoxymethane
BDNF
Benzo(a)pyrene (BaP)
C1q
CagA
Capecitabine
cetuximab (Caco-2 and HCT-116)
chenodeoxycholic acid
choline and amino acid
Chronic oxidative stress
cigarette smoke (CS)
cisplatin (CDDP)
cisplatin (CIS)
Cisplatin-5-fluorouracil
cis-platinum
Cl(-)
cocaine
CoCl(2)
cold stress
comfrey
conjugated linoleic acid
Cyclic mechanical stress (CMS)
cyclophosphamide (CP)
cytomegalovirus
daunorubicin (DNR)
DDP
d-galactosamine
D-GalNLPS
diesel exhaust particles
dietary high-fat
diethylnitrosamine (DEN)
E2+ICI-182780
Early life stress
environment changes
environmental cigarette smoke (ECS)
UV-containing light
Epigallocatechin gallate (EGCG)
Estradiol (E2)
estradiol-17beta
Ethyl 2-((2
external time
light
fludarabine
fluorouracil
fluoxetine
folate- methionine- and choline
folate
methyl
fulvestrant
furan
gamma-irradiation and genotoxic drugs
gamma-irradiationcamptothecin
genotoxic stress
Glucocorticoids (GCs)
glucose
growth hormone
H2O2
haloperidol and clozapine
HCV
heat stress
hemin
hepatitis B virus (HBV)
hepatitis C virus (HCV)
Herpes simplex virus type-1 (HSV-1)
HPV
Human T-cell leukemia virus type 1 (HTLV-1)
Human T-lymphotropic virus type 1 (HTLV-1)
hydroxycamptothecin (HCPT)
hypoxia
ICI-182780 (Fulvestrant)
IFNa-2bribavirin
Imatinib mesylate
indole-3-carbinol
inorganic arsenic compounds
Insulin
Interleukin (IL)-23
interleukin-6 (IL-6)
ionising radiation
ionizing radiation
iron- and aluminum-sulfate
irradiation
ischemia injury
ITF2357
laminar shear stress
lipogenic methyl-deficient diet
lipopolysaccharide
lithium
lithium and valproate
Longevinex
LPS
medroxyprogesterone acetate (MPA)
methacrylic
methotrexate (MTX)
methotrexate and 5-fluorouracil (5-FU)
methotrexateTomudex
methyl
Methyl 2-cyano-3
mitogen 1
monosodium luminol (GVT)
morphine
MPA+RU-486
Mycobacterium leprae
NaCl
nicotine and benzo(a)pyrene
nitric oxide (NO)
nutlin-3a
nutrient
oil or fish oil
Omental fat
opioids (morphine and heroin)
oxidant drugs
oxidative stress
Paclitaxel (Taxol)
paclitaxel-carboplatin
palmitate &Prolonged exposure
palmitate and oleate
phenylbutyric acid (PBA)
Pioglitazone (PIO)
Plasmodium berghei ANKA
Plasmodium chabaudi malaria
proinflammatory stimulus
psychological stress
psychosocial stress
pyruvate kinase type M2 (PKM2)
radical prostatectomy
recombinant leptin
resistance exercise
Restraint stress
Resveratrol (trans-3
Retinoic Acid
RU486 (Mifepristone)
saline
salt
SB431542
serum starvation
serum starvation and chemotherapeutic drug
serum starvation and hypoxia or chemotherapeutic drugs
sodium thiosulfate (STS)
sorafenib
SPC3649
streptozotocin (STZ)
swine influenza virus (SIV)
TAM
Task
taxane
taxol
TCDD
Temozolomide (TMZ)
temperature
teniposide
Testosterone (T)
TGF-beta1
thapsigargin-induced intracellular Ca(++)
the combination carboplatincisplatin with paclitaxel
thermal tolerance
titanium and Anatase coating(AC)
Titanium dioxide nanoparticles (nanoTiO(2) )
topotecan
Topotecan and irinotecan
torpor
trimethyl
unsaturated fatty acids
ursodeoxycholic acid (UDCA)
UV irradiation
vincristine (VCR)
vincristine and daunorubicin
VP-16
Wy-14
Xiezhuo Chubi Decoction (XZCBD)
X-ray
